# Supplementary material for: Isotype heterojunction: tuning the heptazine/triazine phase of crystalline nitrogen-rich C3N5 towards multifunctional photocatalytic applications
Source: Royal Society of Chemistry journal article supplement (doi:10.1039/d3mh01115a), 2023-09-21
Supplement: d3mh01115a1.pdf [file d3mh01115a1.pdf]

## Supporting Information

### **Isotype heterojunction: Tuning the heptazine/triazine phase of crystalline nitrogen-rich C<sub>3</sub>N<sub>5</sub> towards multifunctional photocatalytic applications**

Sue-Faye Ng,<sup>1,2</sup> Joel Jie Foo,<sup>1,2</sup> Wee-Jun Ong<sup>1,2,3,4,5,\*</sup>

<sup>1</sup> *School of Energy and Chemical Engineering, Xiamen University Malaysia, Selangor Darul Ehsan 43900, Malaysia.*

<sup>2</sup> *Center of Excellence for NaNo Energy & Catalysis Technology (CONNECT), Xiamen University Malaysia, Selangor Darul Ehsan 43900, Malaysia.*

<sup>3</sup> *State Key Laboratory of Physical Chemistry of Solid Surfaces, College of Chemistry and Chemical Engineering, Xiamen University, Xiamen 361005, China.*

<sup>4</sup> *Gulei Innovation Institute, Xiamen University, Zhangzhou 363200, China.*

<sup>5</sup> *Shenzhen Research Institute of Xiamen University, Shenzhen 518057, China.*

\* Corresponding author

Wee-Jun Ong: Email: [weejun.ong@xmu.edu.my](mailto:weejun.ong@xmu.edu.my)

## Methodology

### 1. Materials

Urea (Merck,  $\geq 99\%$ ), 3-amino-1H-1,2,4-triazole (3AT, Alfa Aesar, 96%), anhydrous lithium chloride (LiCl, Alfa Aesar, 98%), potassium chloride (KCl, Merck,  $\geq 99.5\%$ ), sodium sulfate anhydrous ( $\text{Na}_2\text{SO}_4$ , Fisher Scientific,  $\geq 99\%$ ) dihydrogen hexachloroplatinate (IV) hexahydrate ( $\text{H}_2\text{Cl}_6\text{Pt}\cdot 6\text{H}_2\text{O}$ , Alfa Aesar), triethanolamine (TEOA, Chemiz), Nafion D-521 dispersion, 5% w/w in water and 1-propanol (Alfa Aesar), isopropyl alcohol (Merck,  $\geq 99.8\%$ ), potassium hydrogen phthalate (Fisher Scientific,  $\geq 98.5\%$ ), potassium iodide (KI, Merck,  $\geq 99.5\%$ ) benzyl alcohol (BA, Alfa Aesar, 99%), and acetonitrile (ACN, Merck,  $\geq 99.9\%$ ) were used. All of the materials were of analytical grade and used without further purification. All aqueous solutions were prepared with deionized (DI) water ( $> 18.2 \text{ M}\Omega \text{ cm}$  resistivity).

### 2. Preparation of pristine $\text{C}_3\text{N}_5$ and g- $\text{C}_3\text{N}_4$

Pristine  $\text{C}_3\text{N}_5$  was synthesized through the thermal polymerization of 3AT. Briefly, 2 g of 3AT was placed in a 100 mL crucible, covered and heated to 550 °C for 3 h in a muffle furnace with a ramping rate of 10 °C  $\text{min}^{-1}$ . The resulting dark brown powder was ground into a fine powder with a pestle mortar after cooling to room temperature.

Pristine g- $\text{C}_3\text{N}_4$  was synthesized through the same route with the substitution of 3AT with 6 g of urea heated to 550 °C for a duration of 2 h with a ramping rate of 10 °C  $\text{min}^{-1}$ .

### 3. Synthesis of crystalline $\text{C}_3\text{N}_5$

Crystalline  $\text{C}_3\text{N}_5$  was synthesized through the molten salt-assisted method with LiCl and KCl. Briefly, 4 g of 3AT, 10.92 g of KCl and 12.96 g of LiCl were ground in a pestle mortar for 10 min. The powder was then transferred to a 100 mL covered crucible with a lid and heated to a certain temperature for 4 h in a muffle furnace with a ramping rate of 12 °C  $\text{min}^{-1}$ . After cooling to room temperature, the powder was washed in DI water at 70 °C and separated through filtration then dried at 80 °C overnight in an oven. The resulting powder was labelled CC3N5-X, whereby X represents the calcination temperature used (400, 450, 500, 550, and 600 °C). A representative diagram of this synthesis procedure is depicted in **Figure S1**.

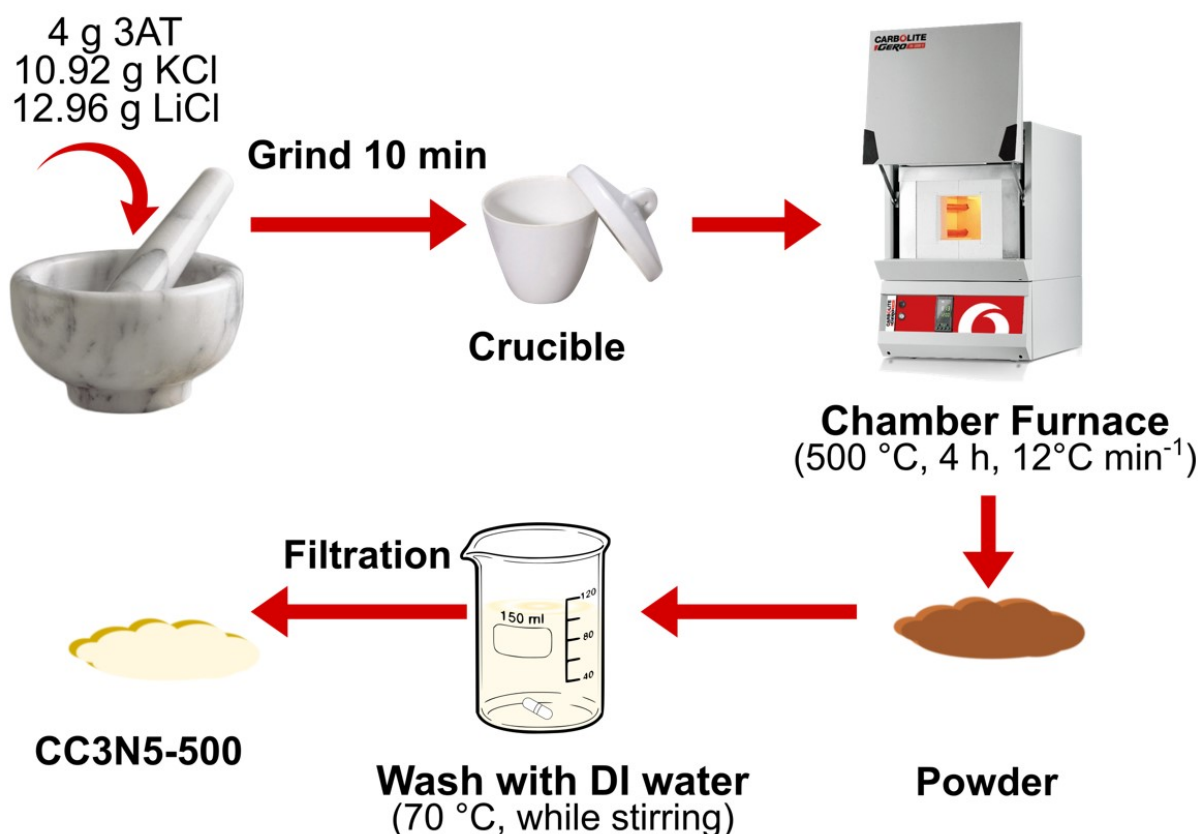

**Figure S1.** Schematic of crystalline  $C_3N_5$  synthesis prepared at 500 °C (CC3N5-500).

#### 4. Characterizations

High resolution transmission electron microscopy (TEM/HRTEM) images were taken by JEOL JEM-2100F microscope equipped with 200 kV field emission analytical electron microscope. Panalytical X'Pert Pro diffractometer with Cu  $K\alpha$  radiation source was acquired to record XRD data at a step size of  $0.02^\circ$  from  $5^\circ$  to  $80^\circ$  ( $2\theta$ ). The Fourier transform infrared spectroscopy (FTIR) spectra were acquired by a PerkinElmer Spectrum Frontier FT-MIR spectrometer, using a standard ATR technique. Each spectrum was generated with a resolution of  $8\text{ cm}^{-1}$  from an average of 16 scans between  $4000$  and  $600\text{ cm}^{-1}$ . A JASCOV-770 ST ultraviolet-visible light (UV-Vis) spectrophotometer was used to measure the UV-Vis absorption spectra of the samples ( $200 < \lambda < 800\text{ nm}$ ). X-ray photoelectron spectroscopy (XPS) was acquired on Kratos AXIS Ultra DLD spectrometer using Al  $K\alpha$  X-ray radiation of 1486.69 eV with calibration in respect to the C 1s peak at 284.6 eV. Electron paramagnetic resonance (EPR) measurements were performed using a Bruker EMX-10/12 EPR spectrometer. Scanning electron microscopy (SEM) energy dispersive X-ray (EDX) analysis was acquired with Carl Zeiss (GeminiSEM 500).

## 5. Photocatalytic measurements

Photocatalytic hydrogen evolution reactions were carried out in a quartz glass reactor. 20 mg of photocatalysts were dispersed in a 60 mL aqueous solution containing 10 vol% sacrificial agent (TEOA) as an electron donor and 1 wt% Pt ( $\text{H}_2\text{PtCl}_6 \cdot 6\text{H}_2\text{O}$ ). The solution was purged with  $\text{N}_2$  gas for 30 min before reaction to remove the residual air. A 300 W Xe lamp (PF300-T8 300W, CEAULIGHT) equipped with a 400 nm cutoff filter was used as a visible light source. The generated  $\text{H}_2$  was measured by gas chromatography (Agilent GC 8890, Argon carrier). The reaction was also conducted in the absence of catalyst as a control test, which had no  $\text{H}_2$  production, confirming that the hydrogen production was a result of the catalytic reaction between the photocatalyst and water. The photocatalytic HER results were replicated two more times in order to obtain the error bar.

For simultaneous benzyl alcohol oxidation and hydrogen generation, the procedure was similar to the photocatalytic HER setup but replacing the sacrificial agent (TEOA) to benzyl alcohol (3 vol%). Benzaldehyde and its derivatives were quantified by high-performance liquid chromatography (Acquity Arc Waters HPLC system; column: Kinetex 2.6  $\mu\text{m}$  Phenyl-Hexyl 100  $\text{\AA}$ ; injection volume: 10  $\mu\text{L}$ ; mobile phase: water/acetonitrile = 60:40; column temperature: 40  $^\circ\text{C}$ ; flow rate: 1  $\text{mL min}^{-1}$ ).

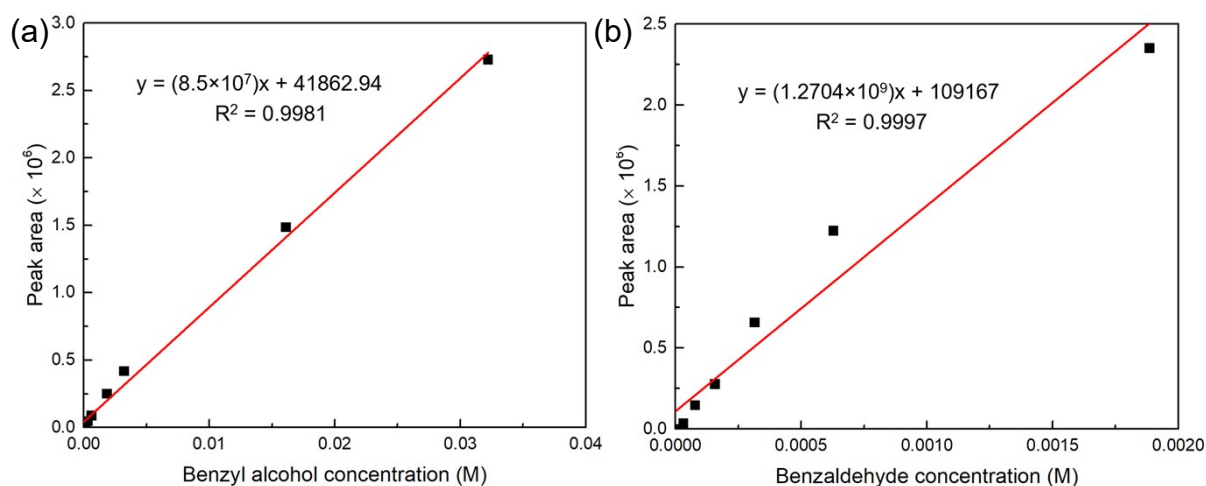

**Figure S2.** Calibration curve of (a) benzyl alcohol and (b) benzaldehyde concentration against peak area.

For photocatalytic  $\text{H}_2\text{O}_2$  production, 20 mg catalyst was dispersed into 60 mL aqueous solution containing 10 vol% isopropyl alcohol. The solution was purged with  $\text{O}_2$  gas for 30 min before

reaction to remove the residual air. A 300 W Xe lamp (PF300-T8 300W, CEAULIGHT) equipped with a 400 nm cutoff filter was used as a visible light source. The H<sub>2</sub>O<sub>2</sub> produced was quantified through an iodometric method. Briefly, 1 mL of suspension was sampled and filtrated to remove the residual photocatalysts. The tested solution was mixed with 1 mL of 0.4 M KI aqueous solution and 1mL of 0.1 M potassium hydrogen phthalate (C<sub>8</sub>H<sub>5</sub>KO<sub>4</sub>) aqueous solution. The absorbance was measured by UV–Vis Spectrophotometer (MAPADA UV-1800) at 310 nm after leaving the solution in the dark for 30 min. The calibration curve is shown below.

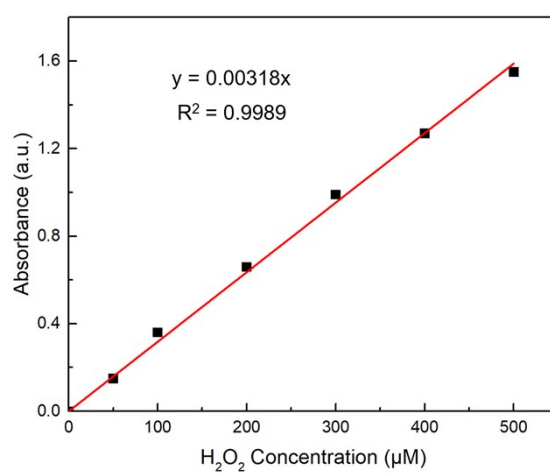

**Figure S3.** Calibration curve of absorbance and H<sub>2</sub>O<sub>2</sub> concentration measured at 310 nm.

Apparent quantum efficiency (AQE) measurements for HER were conducted with different band-pass wavelength irradiations (i.e. 380, 400, 420, 450, and 500 nm). The light intensity was recorded from a spectroradiometer (CEAULIGHT, CEL-NP2000). The AQE value for HER was calculated with the following formula.

$$AQE = \frac{2 \times \text{number of evolved } H_2 \text{ molecules}}{\text{Number of incident photons}} \times 100\%$$

The AQE value for H<sub>2</sub>O<sub>2</sub> production was calculated with the following formula.

$$AQE = \frac{2 \times \text{number of evolved } H_2O_2 \text{ molecules}}{\text{Number of incident photons}} \times 100\%$$

The solar-to-hydrogen (STH) conversion efficiency was obtained under simulated sunlight (AM1.5 filter), and was calculated by using the following equation.

$$STH (\%) = \frac{R_{H_2} \times \Delta G_{H_2}}{P_{sun} \times S_{irr}} \times 100\%$$

Whereby  $R_{H_2}$  denotes the hydrogen evolution rate during the reaction,  $\Delta G_{H_2}$  is the Gibbs free energy of water decomposition reaction (237.13 kJ mol<sup>-1</sup>, 25 °C),  $P_{sun}$  is the optical power density of incident sunlight (84.6 mW cm<sup>-2</sup>) and  $S_{irr}$  is the incident area of sunlight (33.18 cm<sup>2</sup>).

## 6. Recyclability

A fused deposition modelling (FDM) 3D printer (3DX Fab Bear MK3S) was used to print out a 5 × 5 cm circle with grid as a substrate for the catalyst recyclability test. Clear polycarbonate (PC) filament was used for both the circular grid and the holder. The preparation of substrate ink was as follows: 40 mg of catalyst was added to 2 mL DI water and 0.5 mL Nafion and stirred overnight. The ink was then added dropwise onto the 3D printed substrate and dried in an oven at 60 °C for 4 h. The photocatalytic reaction setup was similar to that used during HER experiments in the presence of a water circulating bath at 20 °C. After each cycle, the substrate was immersed in DI water to wash off any residues from the reaction, and then taken out to be dried in an oven at 60 °C before the next cycle.

## 7. Photoelectrochemical measurements

Photoelectrochemical measurements were performed by an electrochemical workstation (Metrohm Autolab, PGSTAT204) with a standard three-electrode cell, where the prepared sample (working electrode), Pt sheet (counter electrode) and Ag/AgCl (in 3.0 M KCl, reference electrode) were immersed in a 0.1 M Na<sub>2</sub>SO<sub>4</sub> solution. The working electrode was prepared with the following procedure. 5 mg of the sample, 40 μL of Nafion and 200 μL of absolute ethanol were stirred overnight. Then, 25 μL of the solution was drop casted onto 1 × 1 cm<sup>2</sup> of a fluorine-doped tin oxide (FTO) glass and dried under ambient temperature. The lifetime of injected electrons ( $\tau$ ) of the photocatalysts were determined via the following expression:

$$\tau = 0.5\pi Fp$$

Whereby  $Fp$  represents the inverse minimum frequency.<sup>1</sup>

The transient photocurrent test was conducted with a 300 W Xe lamp equipped with AM1.5 filter at 0.5 V vs. Ag/AgCl.

For the EPR hydroxyl radical test, 10 mg catalyst was added to 1 mL ultrapure water, followed by adding of 45  $\mu$ L DMPO and ultrasound for 10 min then sealed in a glass tube under argon (Ar) atmosphere for EPR test. The first data point was collected in the dark, and the signal was collected at 10 min of illumination. The EPR superoxide radical test had a similar procedure but with methanol instead of ultrapure water.

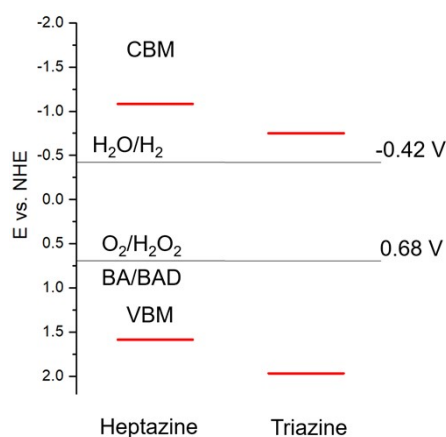

**Figure S4.** Band structure positions of heptazine and triazine  $C_3N_5$  phase.

**Table S1.** Element composition of CC3N5-500 as obtained from XPS data.

| Element | Content (at%) |           |           |
|---------|---------------|-----------|-----------|
|         | $C_3N_5$      | CC3N5-500 | CC3N5-600 |
| C       | 22.27         | 29.80     | 24.89     |
| N       | 77.48         | 54.78     | 50.96     |
| O       | 2.55          | 1.79      | 2.45      |
| K       | -             | 10.71     | 0.08      |
| Li      | -             | 2.80      | 19.19     |
| Cl      | -             | 0.40      | 1.02      |

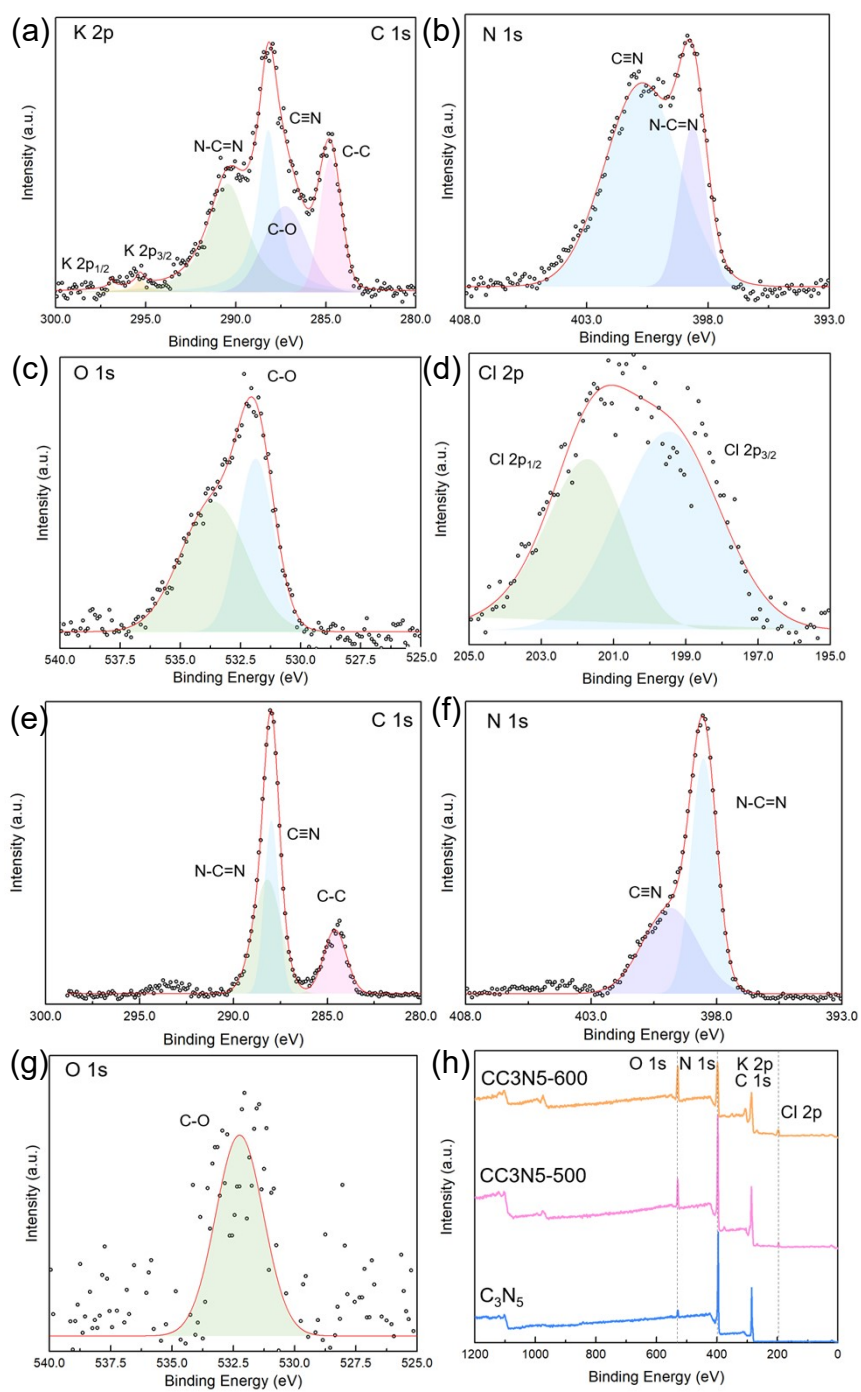

**Figure S5.** High-resolution XPS spectra of (a) C 1s and K 2p, (b) N 1s, (c) O 1s, and (d) Cl 2p of CC3N5-600. XPS spectra of (e) C 1s, (f) N 1s, (g) O 1s, and (h) survey spectra of pristine C<sub>3</sub>N<sub>5</sub>, CC3N5-500 and CC3N5-600.



**Table S2.** Literature comparison of carbon nitride-based photocatalysts for photocatalytic HER.

| Photocatalyst                                                | Light Source | HER Generation ( $\mu\text{mol h}^{-1}$ ) | AQE (%)           | Ref.      |
|--------------------------------------------------------------|--------------|-------------------------------------------|-------------------|-----------|
| K doped g-C <sub>3</sub> N <sub>4</sub>                      | >420 nm      | 65.95                                     | -                 | 2         |
| Ni doped g-C <sub>3</sub> N <sub>4</sub>                     | >400 nm      | 26.65                                     | -                 | 3         |
| C <sub>3</sub> N <sub>4</sub> /C <sub>3</sub> N <sub>5</sub> | >420 nm      | 166.5                                     | 20.6<br>(420 nm)  | 4         |
| NH <sub>2</sub> -UiO-66/C <sub>3</sub> N <sub>5</sub>        | >420 nm      | 19.68                                     | 6.78<br>(420 nm)  | 5         |
| CdS/C <sub>3</sub> N <sub>5</sub>                            | >420 nm      | 7.86                                      | 9.65<br>(420 nm)  | 6         |
| Polymeric g-C <sub>3</sub> N <sub>4</sub>                    | >420 nm      | 61.7                                      | -                 | 7         |
| MoP/crystalline g-C <sub>3</sub> N <sub>4</sub>              | >420 nm      | 265.85                                    | 7.2<br>(420 nm)   | 8         |
| K-doped crystalline g-C <sub>3</sub> N <sub>4</sub>          | AM1.5        | 539.00                                    | 24.50<br>(420 nm) | 9         |
| B-doped g-C <sub>3</sub> N <sub>4</sub>                      | Not Stated   | 91.97                                     | 1.1<br>(420 nm)   | 10        |
| Porous g-C <sub>3</sub> N <sub>4</sub>                       | >410 nm      | 85.47                                     | 7.5<br>(430 nm)   | 11        |
| CC3N5-500                                                    | >400 nm      | 359.97                                    | 12.86<br>(420 nm) | This work |
| CC3N5-500                                                    | AM1.5        | 558.54                                    | -                 | This work |

**Table S3.** Apparent quantum efficiency (AQE) calculation data for the optimal CC3N5-500.

| Wavelength                                          | 380    | 400    | 420    | 450   | 500  |
|-----------------------------------------------------|--------|--------|--------|-------|------|
| H <sub>2</sub> evolution ( $\mu\text{mol h}^{-1}$ ) | 107.03 | 145.62 | 150.97 | 15.35 | 0    |
| Light intensity/area ( $\text{mWcm}^{-2}$ )         | 8.29   | 31.8   | 63.2   | 24.8  | 87.8 |
| AQE (%)                                             | 76.82  | 25.89  | 12.86  | 3.11  | 0    |

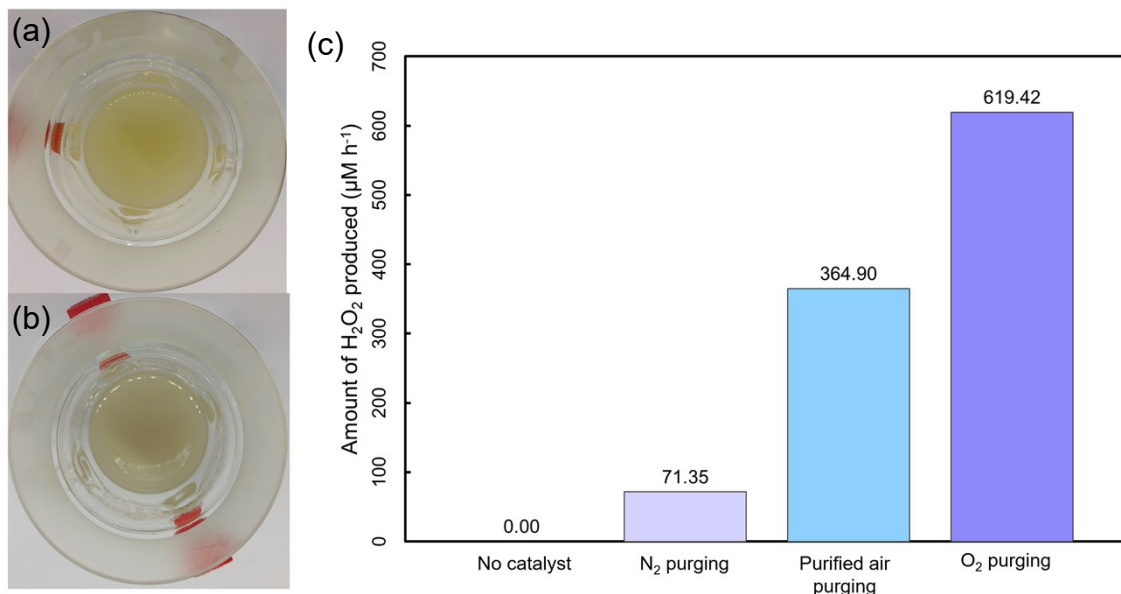

**Figure S6.** Picture of CC3N5-500 (a) before and (b) after simultaneous HER and benzyl alcohol photocatalytic oxidation. (c) Control tests for photocatalytic H<sub>2</sub>O<sub>2</sub> production on CC3N5-550.

**Table S4.** Literature comparison of carbon nitride-based photocatalysts for simultaneous photocatalytic HER and BA oxidation.

| Photocatalyst                                             | Light Source     | HER Generation (μmol h <sup>-1</sup> ) | BAD Generation (μmol h <sup>-1</sup> ) | Ref.      |
|-----------------------------------------------------------|------------------|----------------------------------------|----------------------------------------|-----------|
| N-defect g-C <sub>3</sub> N <sub>4</sub>                  | >420 nm          | 9.80                                   | 9.91                                   | 12        |
| Crystalline g-C <sub>3</sub> N <sub>4</sub>               | >420 nm          | 49.06                                  | 44.16                                  | 13        |
| S-doped g-C <sub>3</sub> N <sub>4</sub>                   | >420 nm          | 3.76                                   | 3.87                                   | 14        |
| Ru-doped crystalline g-C <sub>3</sub> N <sub>4</sub>      | 320 ≤ λ ≤ 850 nm | 57.5                                   | 43.2                                   | 15        |
| Carbon modified g-C <sub>3</sub> N <sub>4</sub>           | >420 nm          | 2.88                                   | 2.31                                   | 16        |
| W-doped g-C <sub>3</sub> N <sub>4</sub>                   | >420 nm          | 2.99                                   | 3.05                                   | 17        |
| Ni doped black phosphorus-g-C <sub>3</sub> N <sub>4</sub> | >420 nm          | 0.928                                  | 0.939                                  | 18        |
| CC3N5-500                                                 | >400 nm          | 85.91                                  | 1490.36                                | This work |

**Table S5.** Literature comparison of carbon nitride-based photocatalysts for H<sub>2</sub>O<sub>2</sub> production.

| Photocatalyst                                           | Light Source | H <sub>2</sub> O <sub>2</sub> Generation (μmol L <sup>-1</sup> h <sup>-1</sup> ) | AQE (%)                         | Ref.      |
|---------------------------------------------------------|--------------|----------------------------------------------------------------------------------|---------------------------------|-----------|
| K/Na doped N-defect g-C <sub>3</sub> N <sub>4</sub>     | >420 nm      | 25.5                                                                             | 30.7 (429 nm)                   | 19        |
| N-defect g-C <sub>3</sub> N <sub>4</sub>                | >420 nm      | 46.85                                                                            | 3.8 (420 nm)                    | 20        |
| Porous g-C <sub>3</sub> N <sub>4</sub> nanotube         | >420 nm      | 93.83                                                                            | -                               | 21        |
| B/O doped defect g-C <sub>3</sub> N <sub>4</sub>        | >420 nm      | 24.8                                                                             | -                               | 22        |
| Methyl viologen ionized g-C <sub>3</sub> N <sub>4</sub> | >420 nm      | 114.2                                                                            | 44.5 (420 nm)                   | 23        |
| B-doped g-C <sub>3</sub> N <sub>4</sub>                 | >420 nm      | 7.97                                                                             | -                               | 24        |
| Ultrathin g-C <sub>3</sub> N <sub>4</sub>               | >400 nm      | 13.3                                                                             | 4.2 (420 nm)                    | 25        |
| WO <sub>3</sub> /g-C <sub>3</sub> N <sub>4</sub>        | >400 nm      | 161                                                                              | -                               | 26        |
| CC3N5-550                                               | >400 nm      | 619.42                                                                           | 20.90 (400 nm)<br>9.49 (420 nm) | This work |

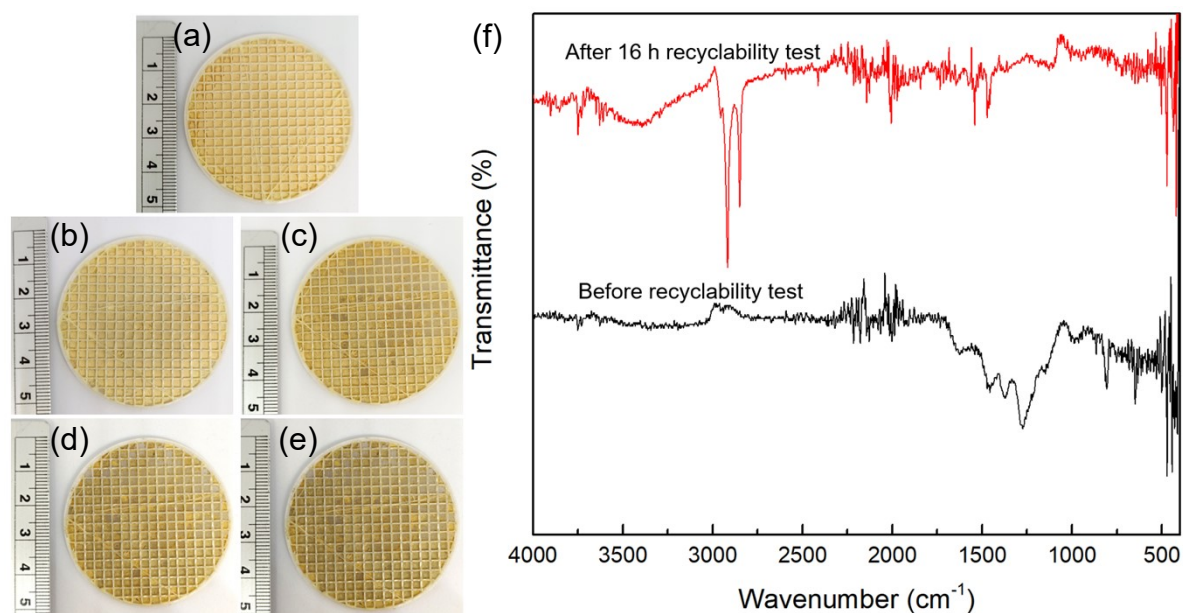**Figure S7.** Pictures of 3D printed substrate loaded with CC3N5-550 catalyst (a) before reaction, after (b) 1 cycle, (c) 2 cycles, (d) 3 cycles, and (e) 4 cycles. (f) FTIR measurements for CC3N5-550 photocatalysts before and after the recyclability test.

**Table S6.** Lifetime of injected electrons ( $\tau$ ), inverse minimum frequency (Fp), ohmic resistance (Rp.S), and charge transfer resistance (Rp.R) calculated from the EIS spectra of carbon nitride catalysts.

| Sample      | $\tau$ (ms) | Fp (Hz) | Rp.R ( $M\Omega \cdot cm^{-2}$ ) |
|-------------|-------------|---------|----------------------------------|
| g- $C_3N_4$ | 1265.14     | 0.13    | $1.10 \times 10^6$               |
| $C_3N_5$    | 399.89      | 0.40    | 6.58                             |
| CC3N5-400   | 12642.38    | 0.01    | $1.10 \times 10^6$               |
| CC3N5-450   | 50.37       | 3.16    | 0.287                            |
| CC3N5-500   | 50.33       | 3.16    | 0.0634                           |
| CC3N5-550   | 126.42      | 1.26    | 0.655                            |
| CC3N5-600   | 159.15      | 1.00    | 1.61                             |

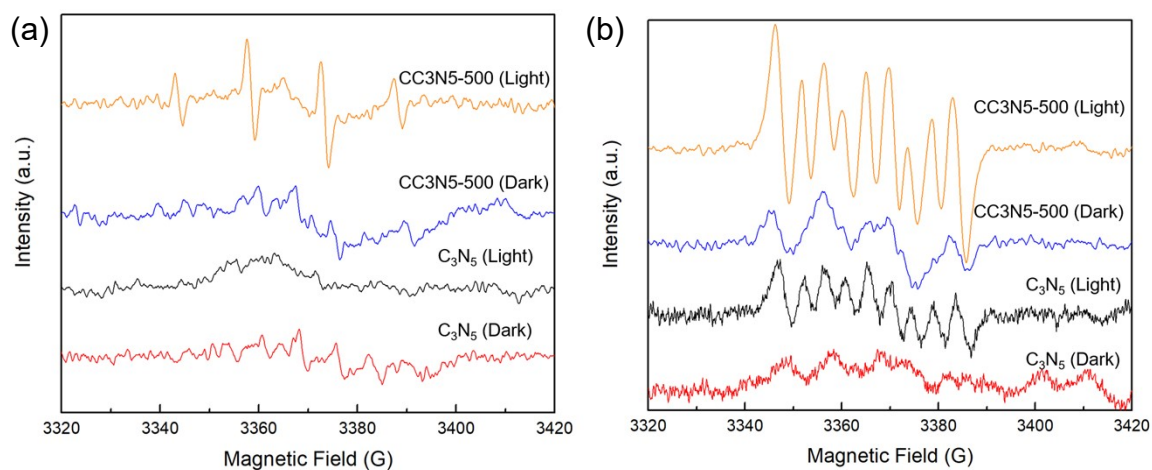

**Figure S8.** EPR spectra of (a) DMPO- $\bullet$ OH and (b) DMPO- $\bullet$ O $_2^-$  compounds over pristine  $C_3N_5$  and CC3N5-500 in the dark and under light illumination for 10 min.

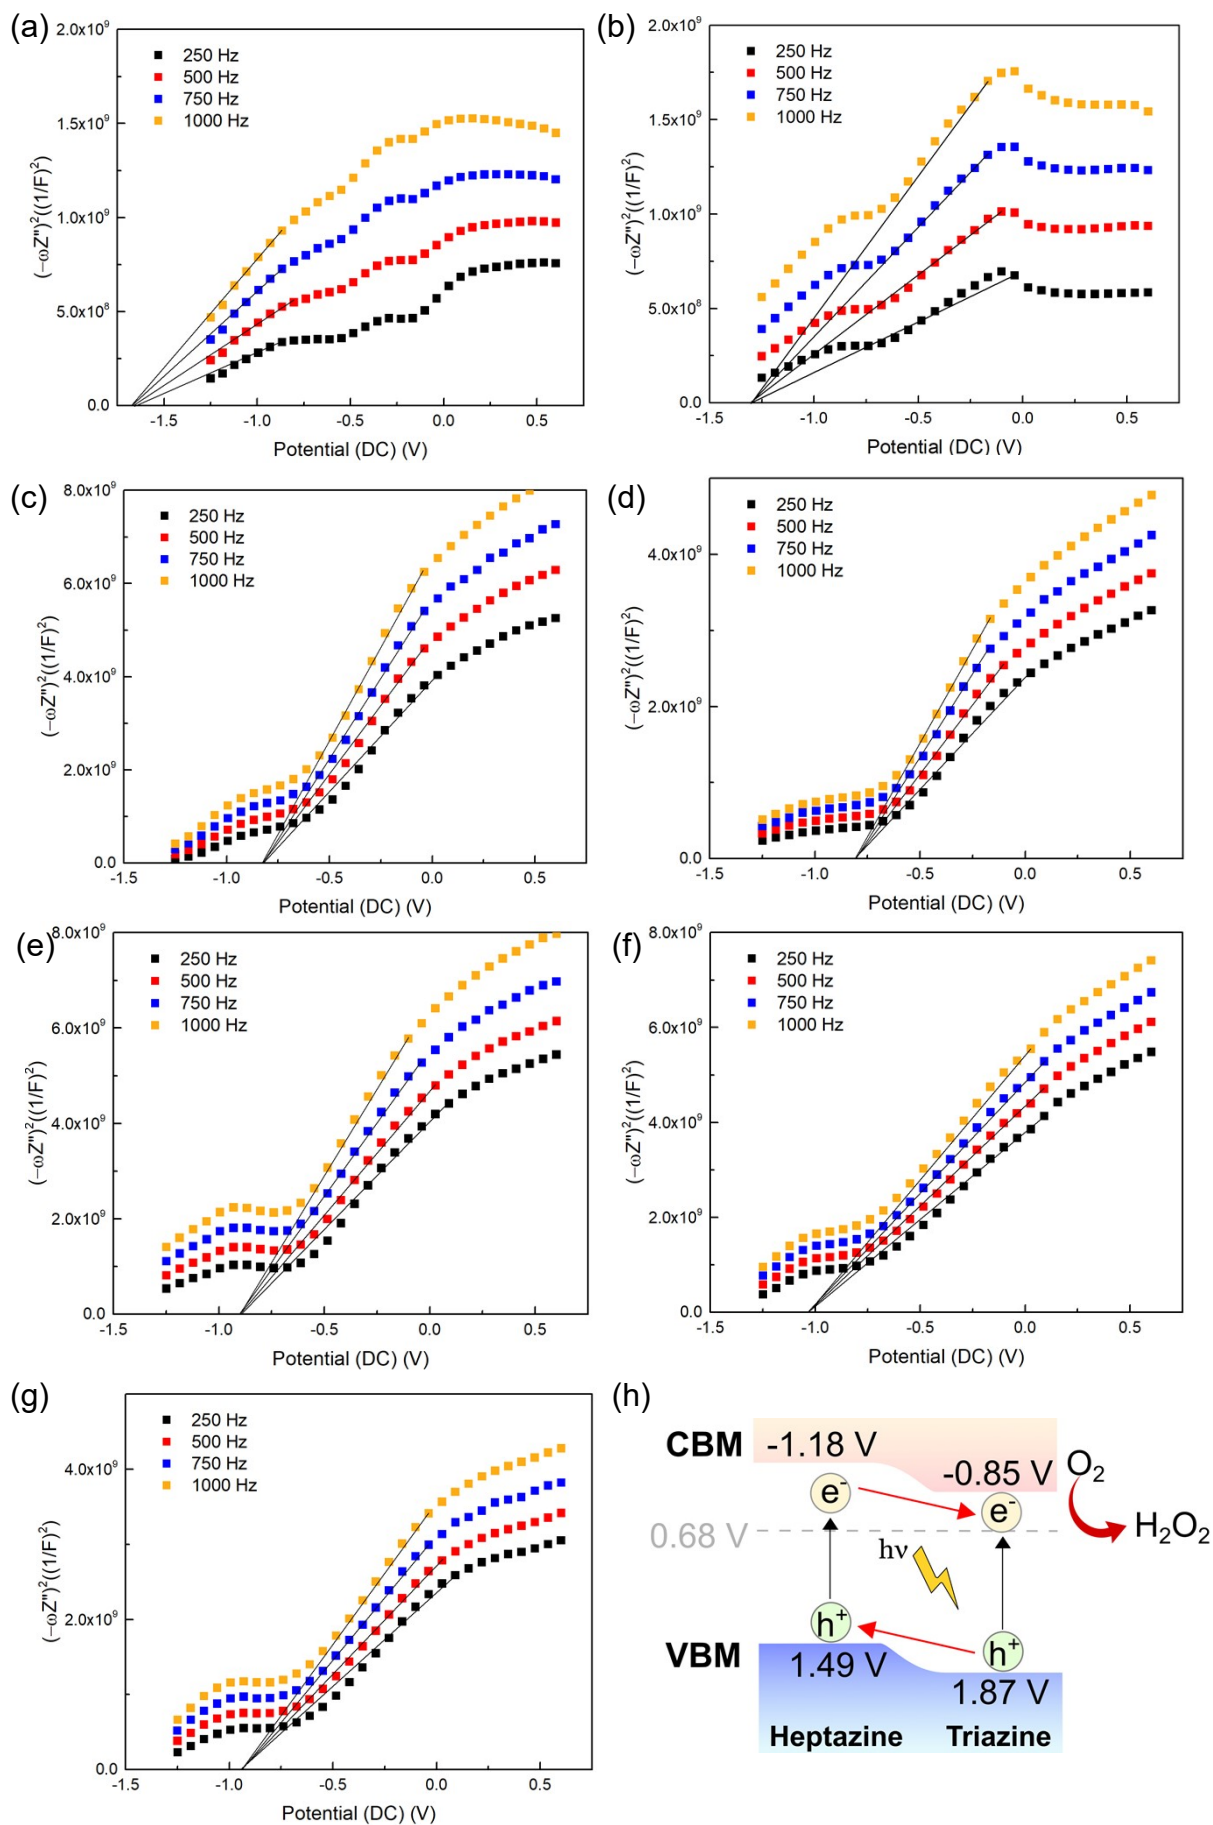

**Figure S9.** Mott Schottky plots for (a) g-C<sub>3</sub>N<sub>4</sub>, (b) C<sub>3</sub>N<sub>5</sub>, (c) CC3N5-400, (d) CC3N5-450, (e) CC3N5-500, (f) CC3N5-550, and (g) CC3N5-600. (h) Band position of the CC3N5-500 catalyst.

**Table S7.** CB and VB positions of carbon nitride samples.

| Sample                          | CB (eV vs. NHE) | VB (eV vs. NHE) |
|---------------------------------|-----------------|-----------------|
| g-C <sub>3</sub> N <sub>4</sub> | -1.583          | 1.397           |
| C <sub>3</sub> N <sub>5</sub>   | -1.183          | 1.487           |
| CC3N5-400                       | -0.713          | 2.067           |
| CC3N5-450                       | -0.71           | 2.08            |
| CC3N5-500                       | -0.793          | 1.857           |
| CC3N5-550                       | -0.933          | 1.707           |
| CC3N5-600                       | -0.853          | 1.867           |

## References

1. C. Liu, H. Huang, X. Du, T. Zhang, N. Tian, Y. Guo and Y. Zhang, *J. Phys. Chem. C*, 2015, **119**, 17156-17165.
2. X. Chang, H. Fan, S. Zhu, L. Lei, X. Wu, C. Feng, W. Wang and L. Ma, *Ceram. Int.*, 2023, **49**, 6729-6738.
3. Y.-C. Huang, Y. Li, K. T. Arul, T. Ohigashi, T. T. T. Nga, Y.-R. Lu, C.-L. Chen, J.-L. Chen, S. Shen, W.-F. Pong, C.-L. Dong and W.-C. Chou, *ACS Sustain Chem. Eng.*, 2023, **11**, 5390-5399.
4. N. Su, S. Cheng, P. Zhang, H. Dong, Y. Fang, X. Zhou, Y. Wang and C. Li, *International Journal of Hydrogen Energy*, 2022, **47**, 41010-41020.
5. B. Wu, T. Sun, N. Liu, L. Lu, R. Zhang, W. Shi and P. Cheng, *ACS Appl. Mater. Interfaces*, 2022, **14**, 26742-26751.
6. X. Wang, K. Wu, W. Cao, K. Rui, W. Wang, R. Zhu, J. Zhu and Z. Yan, *Adv. Mater. Interfaces*, 2023, **10**, 2201627.
7. X. Lin, H. Du, D. Jiang, P. Zhang, Z. Yu, H. Bi and Y. Yuan, *J. Energy Chem.*, 2022, **65**, 541-547.
8. L. Cao, Y. Shi, Z. Chen, Y. Tian, L. Chen, F. Guo and W. Shi, *Mater. Today Comm.*, 2022, **33**, 104354.
9. S. Yang, H. Zhang, J. Wang, J. Xiang, Z. Fu, Y. Wang, Z. Li, H. Xie, S. Tang and Y. Li, *Appl. Surf. Sci.*, 2023, **616**, 156523.
10. W. Dai, R. Wang, Z. Chen, S. Deng, C. Huang, W. Luo and H. Chen, *J. Mater. Chem. A*, 2023, **11**, 7584-7595.
11. S. Mondal, G. Mark, L. Abisdri, J. Li, T. Shmila, J. Tzadikov, M. Volokh, L. Xing and M. Shalom, *Mater. Horiz.*, 2023, **10**, 1363-1372.
12. X. Liu, Q. Zhang, Z. Cui, F. Ma, Y. Guo, Z. Wang, Y. Liu, Z. Zheng, H. Cheng, Y. Dai, B. Huang and P. Wang, *International Journal of Hydrogen Energy*, 2022, **47**, 18738-18747.
13. T. Huo, Q. Deng, F. Yu, G. Wang, Y. Xia, H. Li and W. Hou, *ACS Appl. Mater. Interfaces*, 2022, **14**, 13419-13430.
14. F. Zhang, J. Li, H. Wang, Y. Li, Y. Liu, Q. Qian, X. Jin, X. Wang, J. Zhang and G. Zhang, *Appl. Catal., B*, 2020, **269**, 118772.

15. Q. Yang, T. Wang, Z. Zheng, B. Xing, C. Li and B. Li, *Appl. Catal., B*, 2022, **315**, 121575.
16. H. Wang, J. Zhang, X. Jin, X. Wang, F. Zhang, J. Xue, Y. Li, J. Li and G. Zhang, *J. Mater. Chem. A*, 2021, **9**, 7143-7149.
17. F. Zhang, J. Zhang, H. Wang, J. Li, H. Liu, X. Jin, X. Wang and G. Zhang, *Chem. Eng. J.*, 2021, **424**, 130004.
18. M. Wen, N. Yang, J. Wang, D. Liu, W. Zhang, S. Bian, H. Huang, X. He, X. Wang, S. Ramakrishna, P. K. Chu, S. Yang and X.-F. Yu, *ACS Appl. Mater. Interfaces*, 2021, **13**, 50988-50995.
19. S. Wu, H. Yu, S. Chen and X. Quan, *ACS Catal.*, 2020, **10**, 14380-14389.
20. Y. Zheng, Y. Luo, Q. Ruan, S. Wang, J. Yu, X. Guo, W. Zhang, H. Xie, Z. Zhang and Y. Huang, *Appl. Catal., B*, 2022, **311**, 121372.
21. Y. Song, C. Zhou, Z. Zheng, P. Sun, Y. She, F. Huang, Z. Mo, J. Yuan, H. Li and H. Xu, *J. Alloys Compd.*, 2023, **934**, 167901.
22. Q. You, C. Zhang, M. Cao, B. Wang, J. Huang, Y. Wang, S. Deng and G. Yu, *Appl. Catal., B*, 2023, **321**, 121941.
23. Y. Zhao, J. Gao, Z. Yang, L. Li, J. Cui, P. Zhang, C. Hu, C. Diao and W. Choi, *ACS Catal.*, 2023, **13**, 2790-2801.
24. B. P. Mishra, L. Acharya and K. Parida, *Catal. Sci. Technol.*, 2023, **13**, 1448-1458.
25. J. Hu, P. Zhang, T. Yang, Y. Cai, J. Qu and X. Yang, *Appl. Surf. Sci.*, 2022, **576**, 151841.
26. M. Jourshabani, S. H. Yun, M. Razi Asrami and B. K. Lee, *Chem. Eng. J.*, 2022, **427**, 131710.
